# Supplementary material
Source: MDPI journal article supplement (https://www.mdpi.com/2073-4441/15/23/4099)
Supplement: s1 [file s1 › water-2718914-supplementary.pdf]

## Supplementary data

# The Identification of Selective Pathogenic Microbial Community Biofilms in Different Distribution Pipeline Materials and Their Disinfection Kinetics

Sanam Bhatti <sup>1</sup>, Tanveer A. Gadhi <sup>1</sup>, Rasool Bux Mahar <sup>2</sup>, Imran Ali <sup>3,\*</sup>, Najeebullah Channa <sup>4</sup>, Junaid Ahmed Kori <sup>5</sup> and Barbara Bonelli <sup>4,\*</sup>

<sup>1</sup> U.S. Pakistan Center for Advanced Studies in Water (USPCASW), Mehran University of Engineering and Technology, Jamshoro 76062, Pakistan; sanam47mb@gmail.com (S.B.); tanveer.uspcasw@faculty.muet.edu.pk (T.A.G.)

<sup>2</sup> Benazir Bhutto Shaheed University of Technology and Skill Development Khairpur Mirs, Khairpur 66151, Pakistan; rbma-har.uspcasw@faculty.muet.edu.pk

<sup>3</sup> Department of Environmental Sciences, Sindh Madressatul Islam University, Aiwan-e-Tijarat Road, Karachi 74000, Pakistan

<sup>4</sup> Department of Applied Science and Technology, Politecnico di Torino, Corso Duca degli Abruzzi 24, 10129 Torino, Italy; najeebullah.channa@polito.it

<sup>5</sup> Dr. Panjwani Center for Molecular Medicine and Drug Research, International Center for Chemical and Biological Sciences, University of Karachi, Karachi 75270, Pakistan; junaidkori@gmail.com

\* Correspondence: imranali@hanyang.ac.kr (I.A.); barbara.bonelli@polito.it (B.B.)

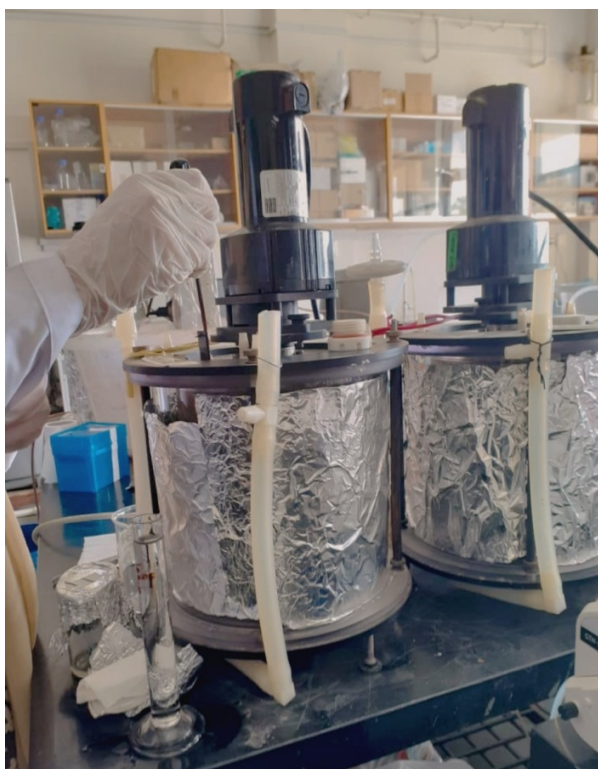

**Figure S1.** Annular reactors (ARs) (Model 1320 LJ, BioSurface Technologies Corporation, USA).

**Table S1.** Operation time, reactor setups, and sample collection details.

|                                                                                               | Disinfectant (chlorine) concentration (mg/L) |         |         |         |
|-----------------------------------------------------------------------------------------------|----------------------------------------------|---------|---------|---------|
|                                                                                               | 0.5                                          | 1.0     | 1.5     | 2.0     |
| Acclimatization                                                                               | 8 weeks                                      | 8 weeks | 8 weeks | 8 weeks |
| Samples collection from four reactor setups of 0.5, 1.0, 1.5, 2.0 mg/L chlorine concentration |                                              |         |         |         |
| Biofilm and bulk water sample collection time                                                 |                                              |         |         |         |
| Sample name                                                                                   | Day 0                                        | Day 7   | Day 14  | Day 21  |
| HDPE (Biofilm)                                                                                | ✓                                            | ✓       | ✓       | ✓       |
| PVC (Biofilm)                                                                                 | ✓                                            | ✓       | ✓       | ✓       |
| PP (Biofilm)                                                                                  | ✓                                            | ✓       | ✓       | ✓       |
| PC (Biofilm)                                                                                  | ✓                                            | ✓       | ✓       | ✓       |
| ABS (Biofilm)                                                                                 | ✓                                            | ✓       | ✓       | ✓       |
| Inlet (Bulk water)                                                                            | ✓                                            | ✓       | ✓       | ✓       |
| Outlet (Bulk water)                                                                           | ✓                                            | ✓       | ✓       | ✓       |

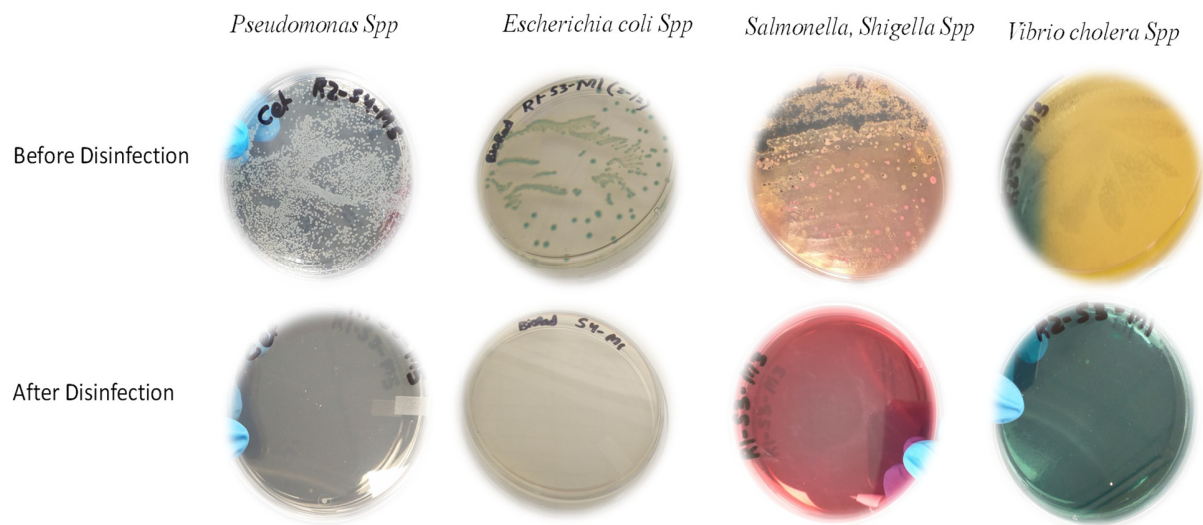

**Figure S2.** Bacterial reduction before and after disinfection in biofilm samples.

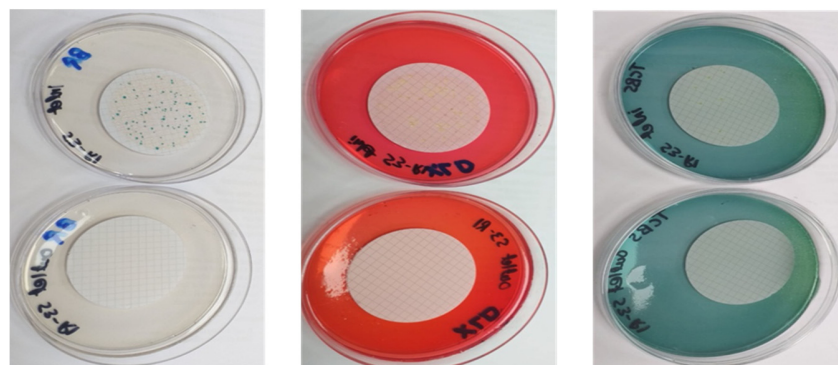

**Figure S3.** Bacterial reduction before and after disinfection in bulk water samples after disinfection at 2.0 mg/L dose.

**Table S2.** Bacterial reduction (log CFU/cm<sup>2</sup>) at 0.5 mg/L and 1.0 mg/L chlorine dose in biofilm samples.

| <i>Pseudomonas</i> Log CFU/100 mL   |         | 0.5 mg/L |       |       | 1.0 mg/L |       |       |       |
|-------------------------------------|---------|----------|-------|-------|----------|-------|-------|-------|
| Material                            | Control | week1    | week2 | week3 | Control  | week1 | week2 | week3 |
| HDPE                                | 4.03    | 3.97     | 3.94  | 3.92  | 4.02     | 3.84  | 3.80  | 3.68  |
| PVC                                 | 4.03    | 3.98     | 3.94  | 3.90  | 4.03     | 3.84  | 3.79  | 3.66  |
| PP                                  | 4.02    | 3.97     | 3.93  | 3.91  | 4.03     | 3.83  | 3.78  | 3.67  |
| PC                                  | 4.02    | 3.98     | 3.94  | 3.91  | 4.03     | 3.82  | 3.77  | 3.66  |
| ABS                                 | 4.02    | 3.98     | 3.93  | 3.90  | 4.02     | 3.83  | 3.76  | 3.66  |
| <i>sallmonila</i> Log CFU/100 mL    |         |          |       |       |          |       |       |       |
| Material                            | Control | week1    | week2 | week3 | Control  | week1 | week2 | week3 |
| HDPE                                | 4.70    | 4.70     | 4.66  | 4.65  | 4.71     | 4.60  | 4.43  | 4.26  |
| PVC                                 | 4.71    | 4.68     | 4.65  | 4.63  | 4.70     | 4.58  | 4.40  | 4.18  |
| PP                                  | 4.74    | 4.69     | 4.67  | 4.61  | 4.72     | 4.56  | 4.45  | 4.23  |
| PC                                  | 4.72    | 4.65     | 4.64  | 4.64  | 4.73     | 4.59  | 4.41  | 4.26  |
| ABS                                 | 4.71    | 4.68     | 4.66  | 4.62  | 4.71     | 4.54  | 4.38  | 4.20  |
| <i>shegilla</i> Log CFU/100 mL      |         |          |       |       |          |       |       |       |
| Material                            | Control | week1    | week2 | week3 | Control  | week1 | week2 | week3 |
| HDPE                                | 5.32    | 5.27     | 5.21  | 5.15  | 5.35     | 5.11  | 5.02  | 4.93  |
| PVC                                 | 5.34    | 5.28     | 5.21  | 5.09  | 5.34     | 5.10  | 5.03  | 4.93  |
| PP                                  | 5.33    | 5.27     | 5.21  | 5.15  | 5.34     | 5.10  | 5.02  | 4.92  |
| PC                                  | 5.32    | 5.27     | 5.21  | 5.16  | 5.35     | 5.10  | 5.03  | 4.93  |
| ABS                                 | 5.33    | 5.27     | 5.22  | 5.16  | 5.35     | 5.09  | 5.02  | 4.92  |
| <i>vibro cholera</i> Log CFU/100 mL |         |          |       |       |          |       |       |       |
| Material                            | Control | week1    | week2 | week3 | Control  | week1 | week2 | week3 |
| HDPE                                | 5.35    | 5.32     | 5.27  | 5.23  | 5.35     | 5.15  | 5.06  | 4.99  |
| PVC                                 | 5.35    | 5.32     | 5.27  | 5.22  | 5.32     | 5.15  | 5.06  | 4.98  |
| PP                                  | 5.35    | 5.31     | 5.27  | 5.21  | 5.34     | 5.16  | 5.06  | 4.98  |
| PC                                  | 5.35    | 5.31     | 5.27  | 5.21  | 5.33     | 5.15  | 5.06  | 4.99  |
| ABS                                 | 5.35    | 5.32     | 5.27  | 5.21  | 5.33     | 5.15  | 5.06  | 4.98  |
| HPC Log CFU/100 mL                  |         |          |       |       |          |       |       |       |
| Material                            | Control | week1    | week2 | week3 | Control  | week1 | week2 | week3 |
| HDPE                                | 5.32    | 5.26     | 5.23  | 5.17  | 5.32     | 5.10  | 5.03  | 4.95  |
| PVC                                 | 5.32    | 5.26     | 5.22  | 5.17  | 5.31     | 5.10  | 5.04  | 4.94  |
| PP                                  | 5.32    | 5.27     | 5.22  | 5.17  | 5.32     | 5.10  | 5.03  | 4.95  |
| PC                                  | 5.32    | 5.26     | 5.23  | 5.17  | 5.32     | 5.10  | 5.03  | 4.94  |
| ABS                                 | 5.32    | 5.26     | 5.21  | 5.17  | 5.31     | 5.10  | 5.04  | 4.94  |

**Table S3.** Bacterial reduction (log CFU/cm<sup>2</sup>) at 1.5 mg/L and 2.0 mg/L chlorine dose.

| <i>Pseudomonas</i> Log CFU/100 mL   |         |       |       |       |          |       |       |       |
|-------------------------------------|---------|-------|-------|-------|----------|-------|-------|-------|
| 1.5 mg/L                            |         |       |       |       | 2.0 mg/L |       |       |       |
| Material                            | Control | week1 | week2 | week3 | Control  | week1 | week2 | week3 |
| HDPE                                | 4.03    | 3.49  | 3.19  | 2.81  | 4.03     | 1.73  | 0     | 0     |
| PVC                                 | 4.02    | 3.48  | 3.16  | 2.77  | 4.05     | 2.03  | 0     | 0     |
| PP                                  | 4.02    | 3.48  | 3.17  | 2.84  | 4.03     | 2.20  | 0     | 0     |
| PC                                  | 4.02    | 3.48  | 3.14  | 2.73  | 4.03     | 2.03  | 0     | 0     |
| ABS                                 | 4.02    | 3.47  | 3.16  | 2.77  | 4.00     | 1.73  | 0     | 0     |
| <i>sallmonila</i> Log CFU/100 mL    |         |       |       |       |          |       |       |       |
| Material                            | Control | week1 | week2 | week3 | Control  | week1 | week2 | week3 |
| HDPE                                | 4.68    | 3.90  | 3.30  | 0.00  | 4.70     | 0     | 0     | 0     |
| PVC                                 | 4.69    | 3.85  | 0.00  | 0.00  | 4.71     | 0     | 0     | 0     |
| PP                                  | 4.70    | 3.78  | 3.00  | 0.00  | 4.74     | 0     | 0     | 0     |
| PC                                  | 4.68    | 3.85  | 3.48  | 0.00  | 4.72     | 0     | 0     | 0     |
| ABS                                 | 4.69    | 3.90  | 3.30  | 0.00  | 4.71     | 0     | 0     | 0     |
| <i>shegilla</i> Log CFU/100 mL      |         |       |       |       |          |       |       |       |
| Material                            | Control | week1 | week2 | week3 | Control  | week1 | week2 | week3 |
| HDPE                                | 5.34    | 3.90  | 4.67  | 4.45  | 5.35     | 3.85  | 0     | 0     |
| PVC                                 | 5.34    | 3.85  | 4.66  | 4.46  | 5.35     | 3.90  | 0     | 0     |
| PP                                  | 5.35    | 3.78  | 4.65  | 4.43  | 5.35     | 3.78  | 0     | 0     |
| PC                                  | 5.34    | 3.85  | 4.64  | 4.45  | 5.34     | 3.85  | 0     | 0     |
| ABS                                 | 5.35    | 3.90  | 4.65  | 4.43  | 5.35     | 3.90  | 0     | 0     |
| <i>vibro cholera</i> Log CFU/100 mL |         |       |       |       |          |       |       |       |
| Material                            | Control | week1 | week2 | week3 | Control  | week1 | week2 | week3 |
| HDPE                                | 5.35    | 4.89  | 4.76  | 4.58  | 5.35     | 3.95  | 0     | 0     |
| PVC                                 | 5.35    | 4.90  | 4.75  | 4.59  | 5.35     | 3.90  | 0     | 0     |
| PP                                  | 5.34    | 4.89  | 4.74  | 4.57  | 5.34     | 3.85  | 0     | 0     |
| PC                                  | 5.34    | 4.89  | 4.75  | 4.58  | 5.35     | 3.90  | 0     | 0     |
| ABS                                 | 5.35    | 4.90  | 4.76  | 4.57  | 5.35     | 3.95  | 0     | 0     |
| HPC log CFU/100 mL                  |         |       |       |       |          |       |       |       |
| Material                            | Control | week1 | week2 | week3 | Control  | week1 | week2 | week3 |
| HDPE                                | 5.32    | 4.85  | 4.71  | 4.49  | 5.32     | 4.04  | 0     | 0     |
| PVC                                 | 5.32    | 4.85  | 4.70  | 4.51  | 5.32     | 4.00  | 0     | 0     |
| PP                                  | 5.32    | 4.84  | 4.72  | 4.49  | 5.32     | 3.95  | 0     | 0     |
| PC                                  | 5.32    | 4.85  | 4.72  | 4.48  | 5.32     | 4.00  | 0     | 0     |
| ABS                                 | 5.32    | 4.85  | 4.71  | 4.49  | 5.32     | 4.04  | 0     | 0     |
